# Supplementary material for: Effective strategies toward imine-linked cationic covalent organic frameworks for rapid and selective removal of 99TcO4− from water: insights from DFT and MD calculations
Source: Royal Society of Chemistry journal article supplement (doi:10.1039/d2en01049f), 2022-12-26
Supplement: d2en01049f1.pdf [file d2en01049f1.pdf]

## Effective strategies toward imine-linked cationic covalent organic frameworks for rapid and selective removal of $^{99}\text{TcO}_4^-$ from water: Insights from DFT and MD calculations

Chaofeng Zhao<sup>†</sup>, Xinjie Ma<sup>†</sup>, Xin Wei<sup>§</sup>, Weiwei Liu<sup>‡</sup>, Lu Sun<sup>\*‡</sup>, Yuejie Ai<sup>\*†</sup>

<sup>†</sup> MOE Key Laboratory of Resources and Environmental Systems Optimization, College of Environmental Science and Engineering, North China Electric Power University, Beijing 102206, P. R. China

<sup>‡</sup> Institute of Modern Optics, Tianjin Key Laboratory of Micro-scale Optical Information Science and Technology, Nankai University, Tianjin, 300350, P. R. China

<sup>§</sup> School of Control and Computer Engineering, North China Electric Power University, Beijing 102206, P. R. China

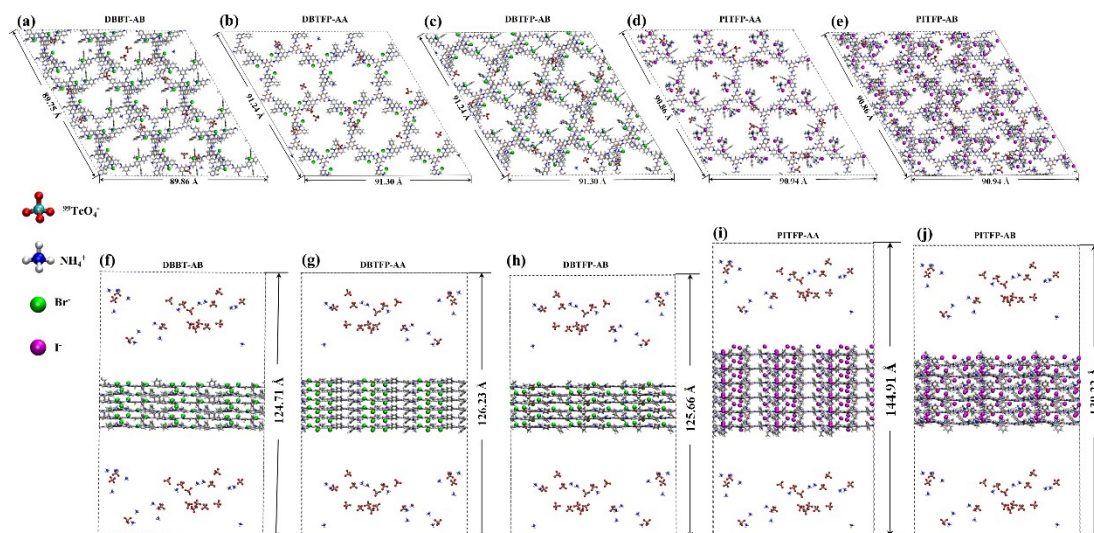

**Fig. S1.** The top views (a-e) and side views (f-j) of the initial configurations for the MD simulated DBBT-AB, DBTFP-AA, DBTFP-AB, PITFP-AA and PITFP-AB systems under the LC condition. All cationic COFs are displayed as licorice style and water molecules are hidden to clarify the position of other molecules.

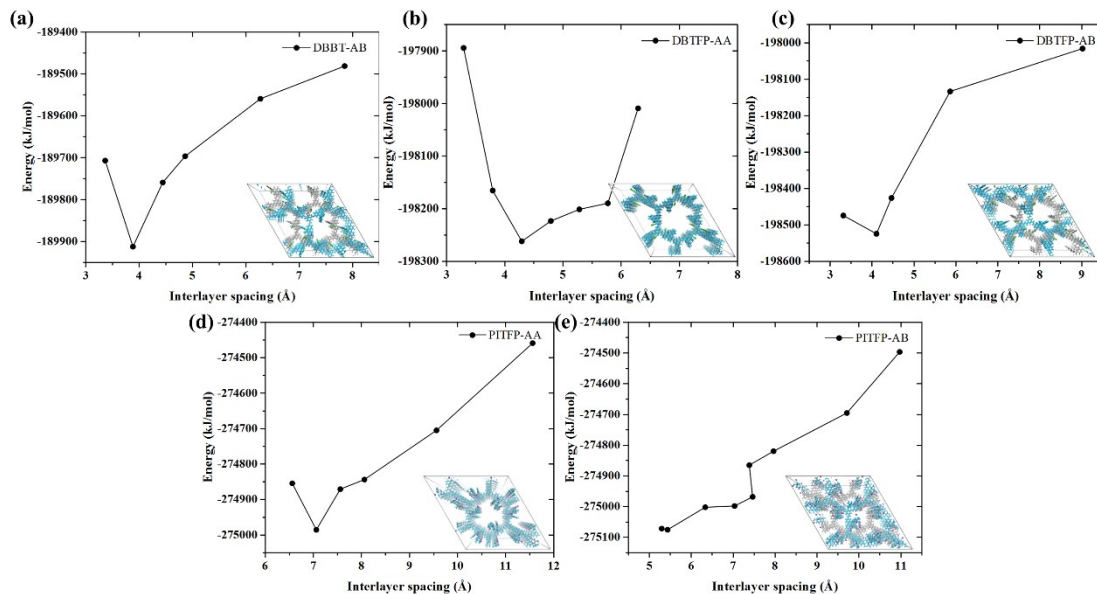

**Fig. S2.** The energies of (a) DBBT-AB, (b) DBTFP-AA, (c) DBTFP-AB, (d) PITFP-AA, (e) PITFP-AB in different interlayer distances together with the optimal structures.

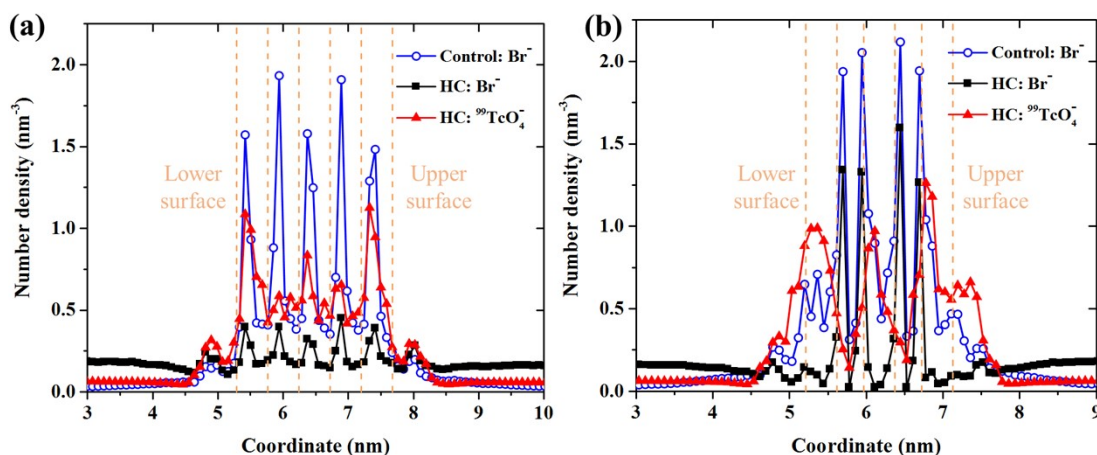

**Fig. S3.** The number densities of  $\text{Br}^-$  and  $^{99}\text{TcO}_4^-$  in (a) DBBT-AA and (b) DBBT-AB under the HC condition together with the data of  $\text{Br}^-$  in the control group. The orange dashed lines show the location of each layer.

As for the HC condition in Fig. S3, in addition to the booming amount, more  $^{99}\text{TcO}_4^-$  prefer to locate at the lower and upper surfaces of DBBT with large proportions. From the distributions of remaining  $\text{Br}^-$  in DBBT,  $\text{Br}^-$  ions near the surfaces are almost completely desorbed but it in inner layers are difficult to desorb. Combined with the self-exfoliated feature of cationic COFs,<sup>1</sup> we can conclude that the fewer layer of DBBT is more efficient in practical application for  $^{99}\text{TcO}_4^-$  elimination.

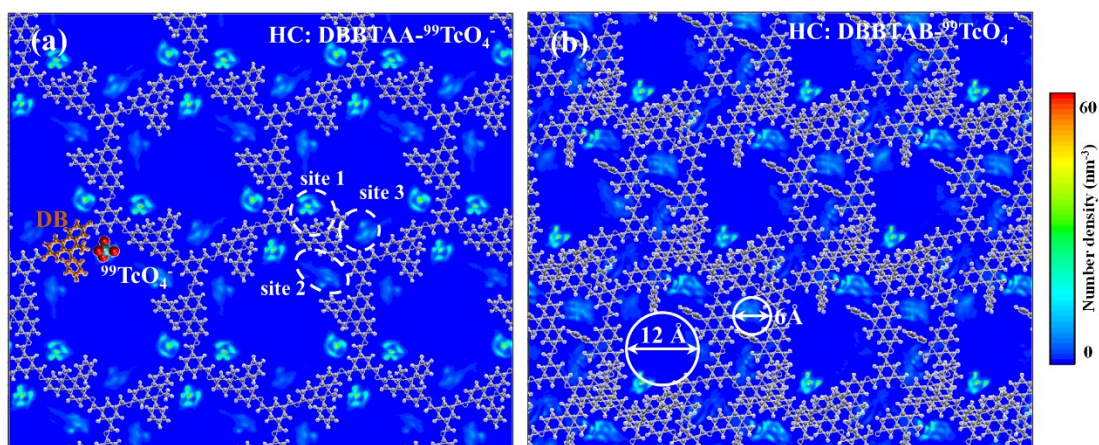

**Fig. S4.** The 2D number density distributions of  $^{99}\text{TcO}_4^-$  in (a) DBBT-AA and (b) DBBT-AB under the HC condition.

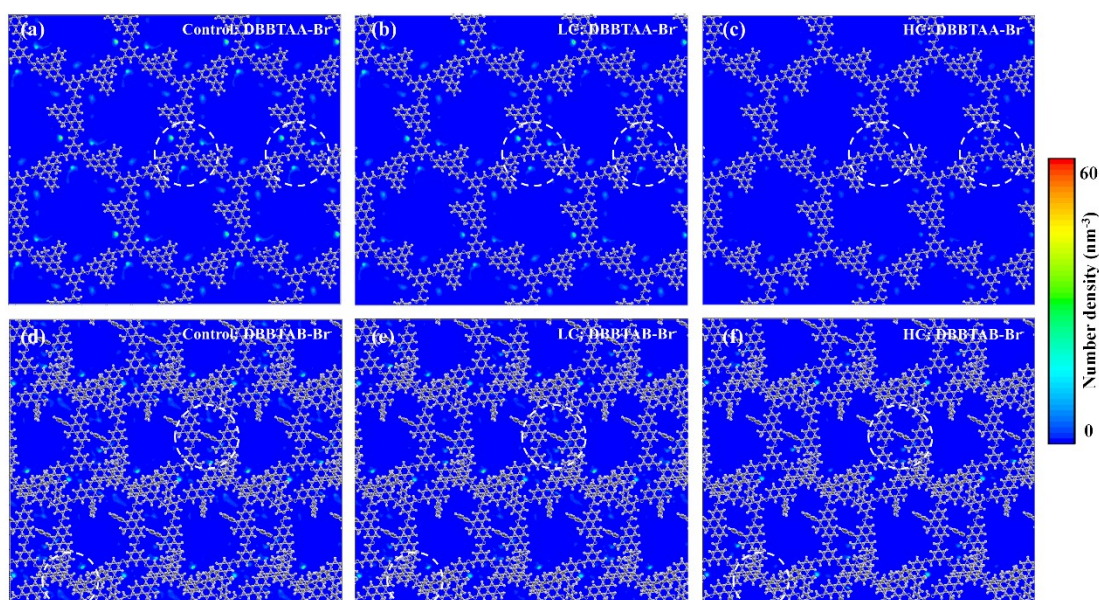

**Fig. S5.** The 2D number density distributions of remaining  $\text{Br}^-$  in DBBT-AA (a-c) and DBBT-AB (d-f) under the control group, LC and HC conditions, respectively.

From Fig. S5, the 2D number density distributions of the remaining  $\text{Br}^-$  in DBBT-AA and DBBT-AB under each condition show that decreasing number densities of  $\text{Br}^-$  is associated with the increased adsorption of  $^{99}\text{TcO}_4^-$  near the anion binding sites, indicating effective anion-exchange process between them.



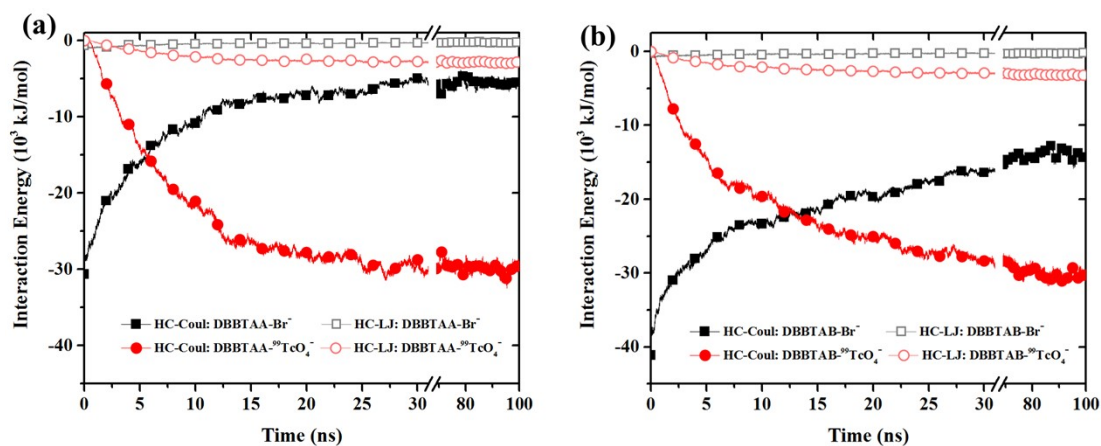

**Fig. S6.** The Coulomb interaction energies and LJ potentials between (a) DBBT-AA as well as (b) DBBT-AB and anions at HC condition.

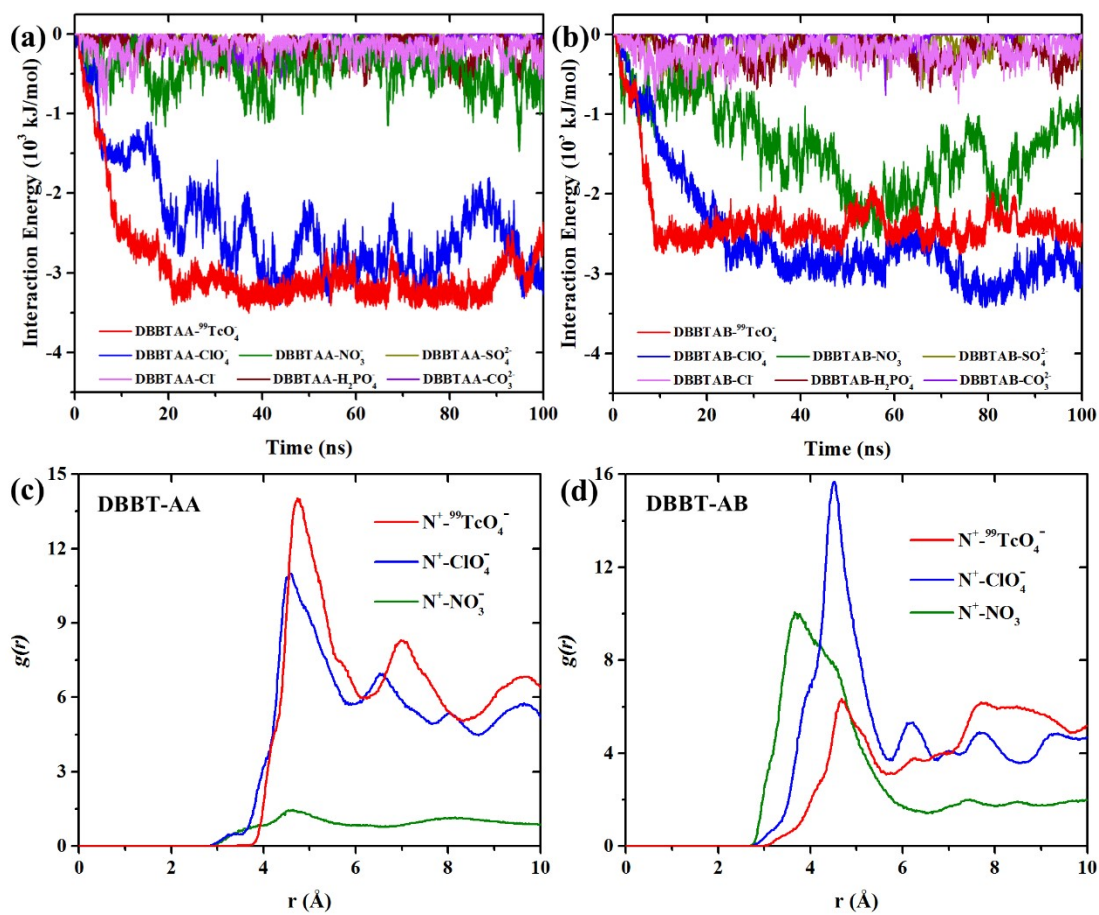

**Fig. S7.** The Coulomb interaction energies between (a) DBBT-AA as well as (b) DBBT-AB and anions. The radial distribution functions of <sup>99</sup>TcO<sub>4</sub><sup>-</sup>, ClO<sub>4</sub><sup>-</sup> and NO<sub>3</sub><sup>-</sup> near the positively charged nitrogen atoms in (c) DBBT-AA and (d) DBBT-AB.

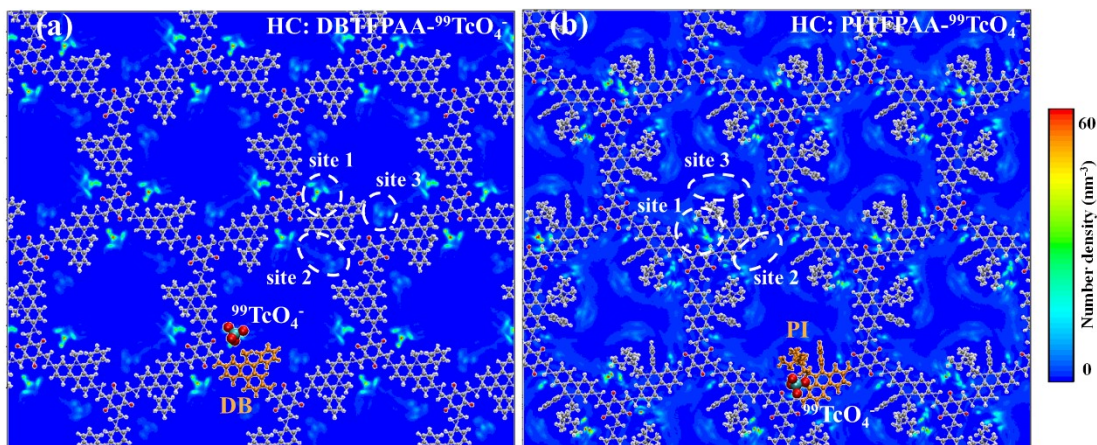

**Fig. S8.** The 2D number density distributions of  $^{99}\text{TcO}_4^-$  in (a) DBTFP-AA and (b) PITFP-AA under the HC condition.

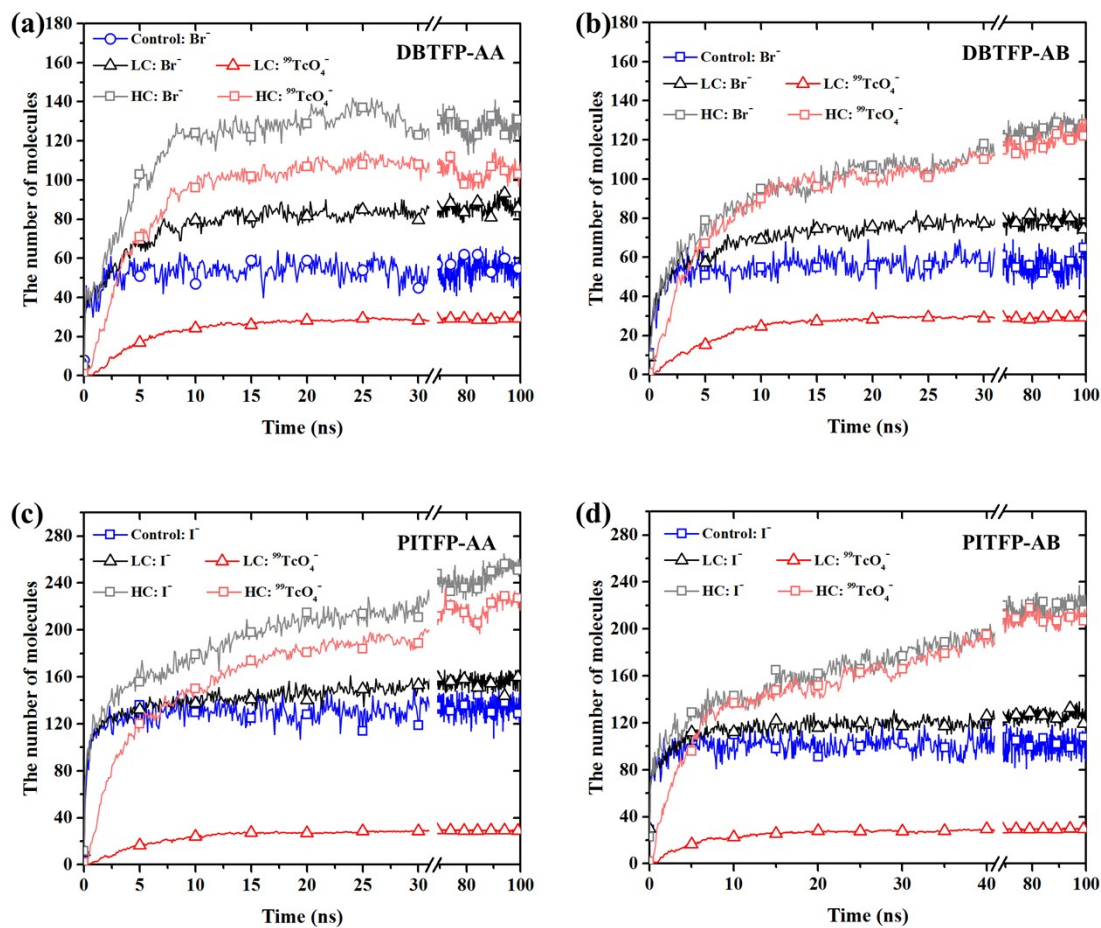

**Fig. S9.** Time evolution of the amounts of desorbed  $\text{Br}^-$  (or  $\text{I}^-$ ) and adsorbed  $^{99}\text{TcO}_4^-$  in (a) DBTFP-AA, (b) DBTFP-AB, (c) PITFP-AA and (d) PITFP-AB under different conditions.

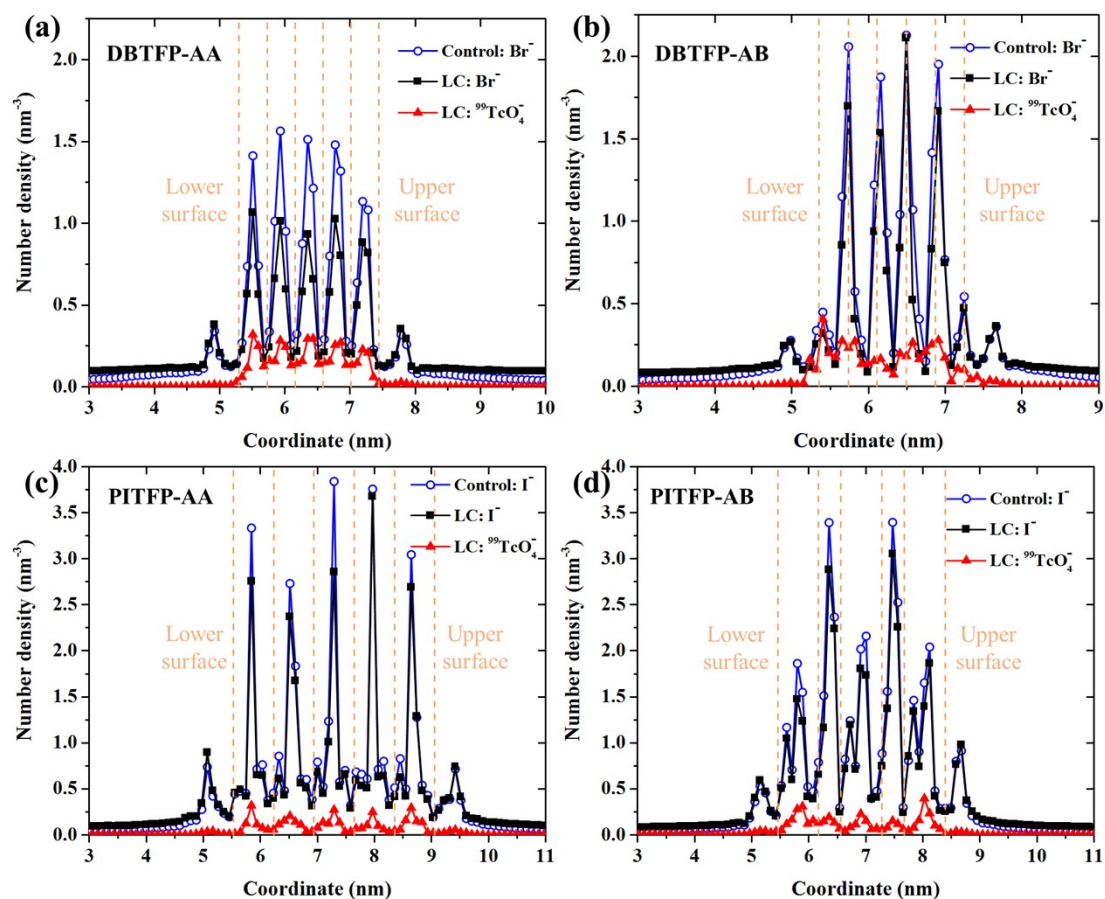

**Fig. S10.** The number densities of Br<sup>-</sup> (or I<sup>-</sup>) and <sup>99</sup>TcO<sub>4</sub><sup>-</sup> in (a) DBTFP-AA, (b) DBTFP-AB, (c) PITFP-AA and (d) PITFP-AB under LC condition together with the data of Br<sup>-</sup> (or I<sup>-</sup>) in the control group. The orange dashed lines show the location of each layer.



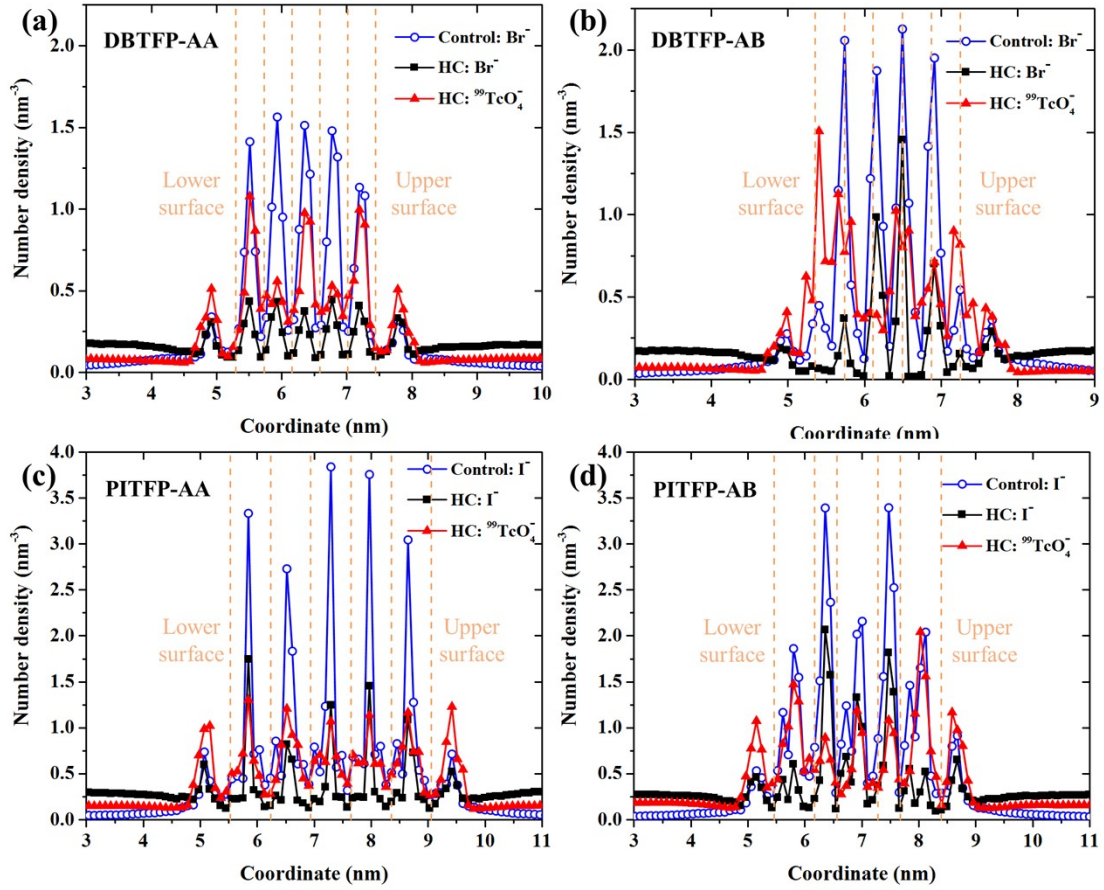

**Fig. S11.** The number densities of Br<sup>-</sup> (or I<sup>-</sup>) and <sup>99</sup>TcO<sub>4</sub><sup>-</sup> in (a) DBTFP-AA, (b) DBTFP-AB, (c) PITFP-AA and (d) PITFP-AB under HC condition together with the data of Br<sup>-</sup> (or I<sup>-</sup>) in the control group. The orange dashed lines show the location of each layer.

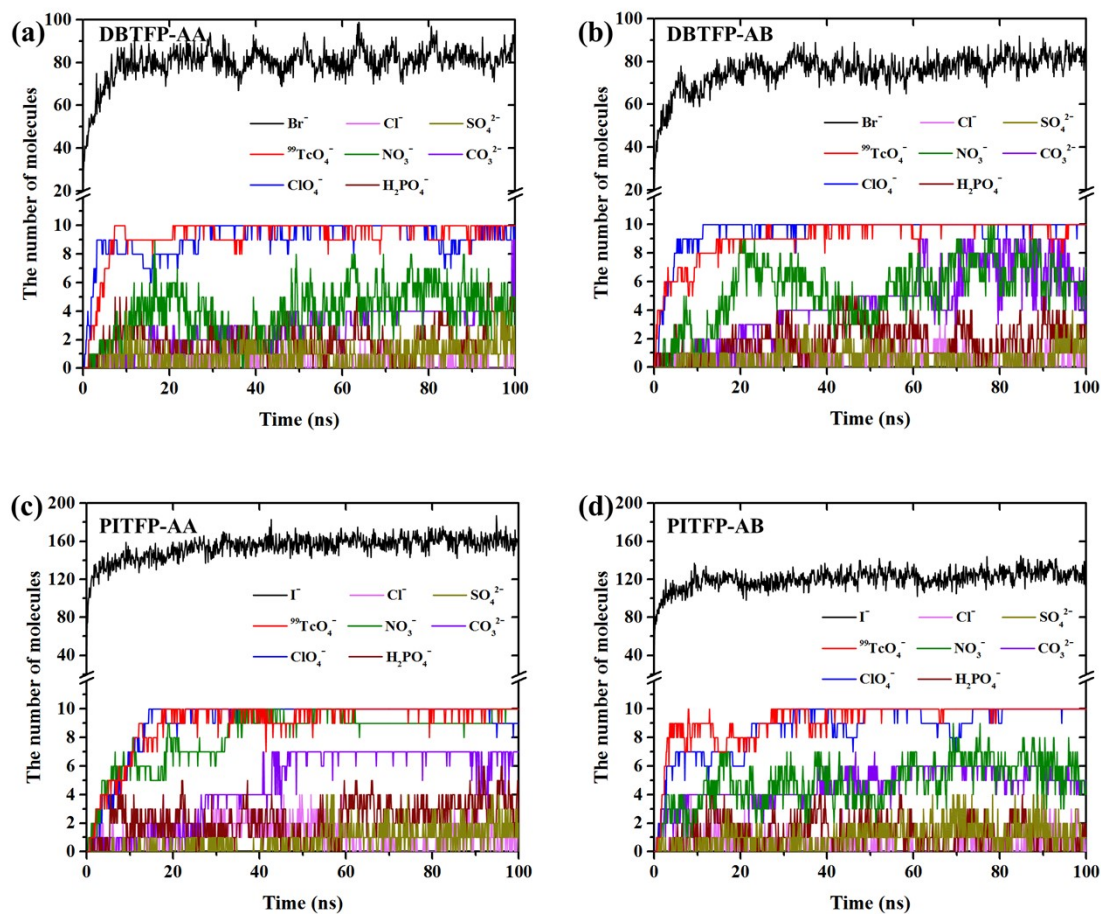

**Fig. S12.** Time evolution of the amounts of desorbed Br<sup>-</sup> (or I<sup>-</sup>) and adsorbed TcO<sub>4</sub><sup>-</sup> as well as competing anions in (a) DBTFP-AA, (b) DBTFP-AB, (c) PITFP-AA and (d) PITFP-AB.



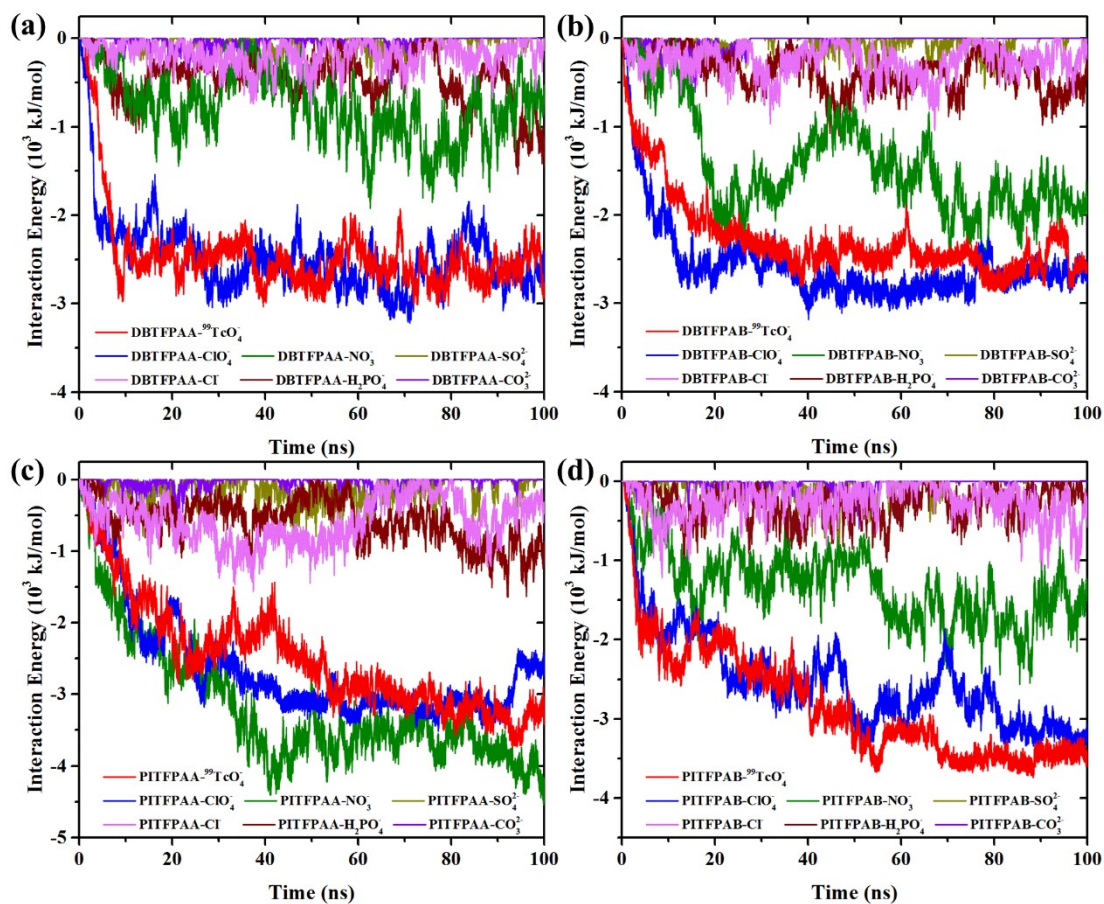

**Fig. S13.** The Coulomb interaction energies between (a) DBTFP-AA, (b) DBTFP-AB, (c) PITFP-AA as well as (d) PITFP-AB and anions.

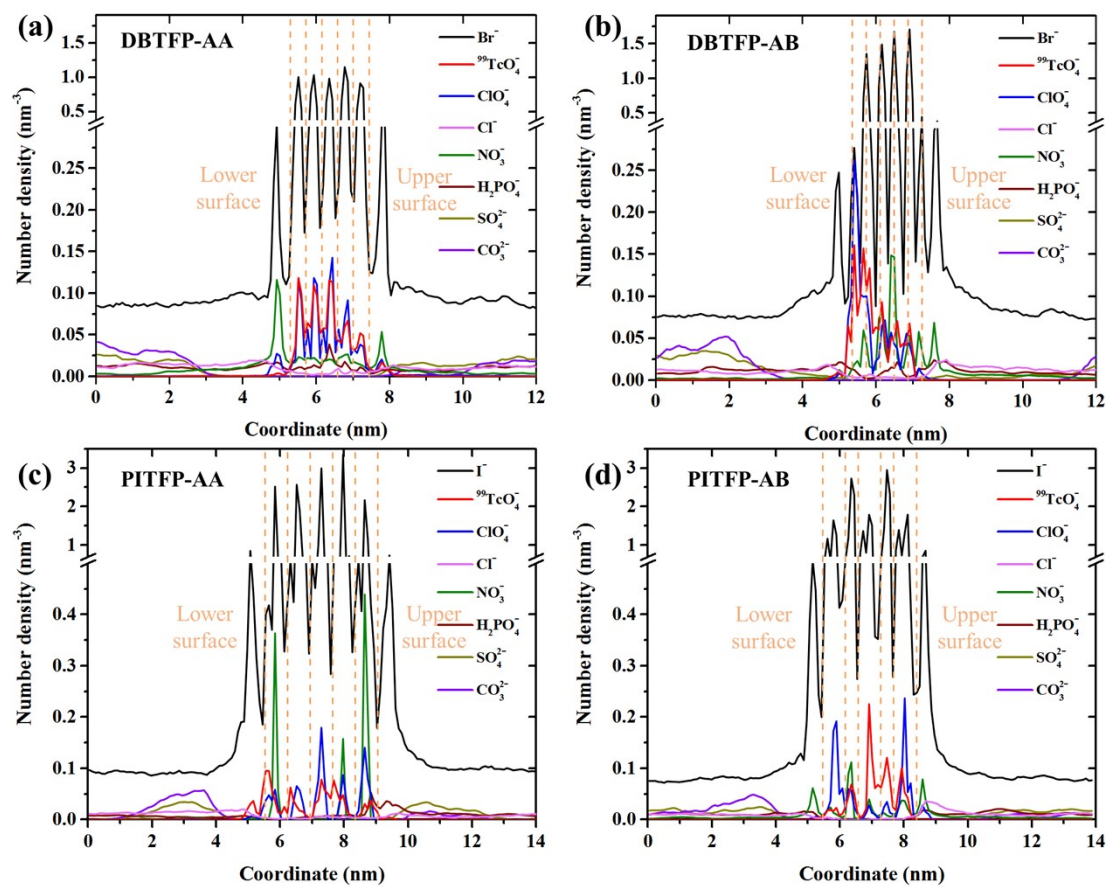

**Fig. S14.** The number densities of Br<sup>-</sup> (or I<sup>-</sup>), <sup>99</sup>TcO<sub>4</sub><sup>-</sup> and competing anions in (a) DBTFP-AA, (b) DBTFP-AB, (c) PITFP-AA and (d) PITFP-AB. The orange dashed lines show the location of each layer.

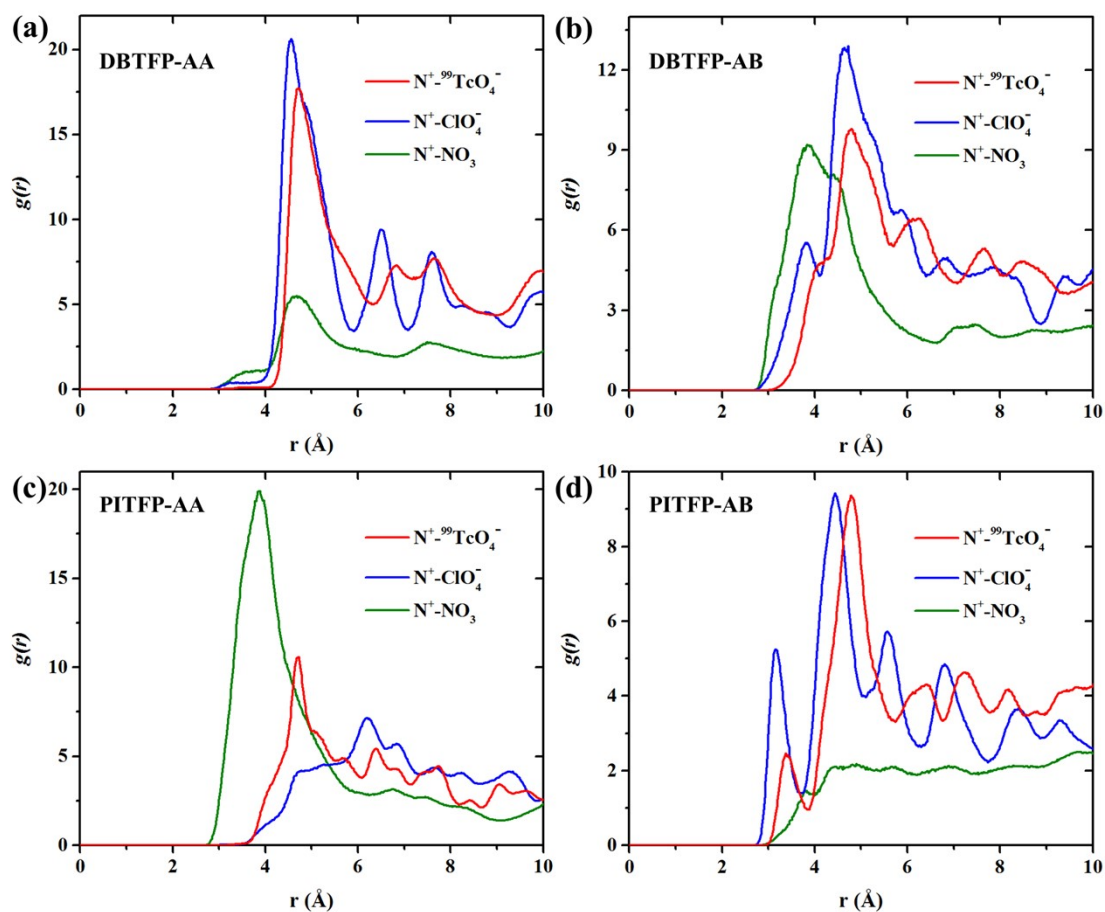

**Fig. S15.** The radial distribution functions ( $g(r)$ ) of  $^{99}\text{TcO}_4^-$  together with  $\text{ClO}_4^-$  and  $\text{NO}_3^-$  near the positively charged nitrogen atoms in (a) DBTFP-AA, (b) DBTFP-AB, (c) PITFP-AA and (d) PITFP-AB.

1. S. Mitra, S. Kandambeth, B. P. Biswal, A. Khayum M, C. K. Choudhury, M. Mehta, G. Kaur, S. Banerjee, A. Prabhune and S. Verma, Self-exfoliated guanidinium-based ionic covalent organic nanosheets (iCONs), *Journal of the American Chemical Society*, 2016, **138**, 2823-2828.
